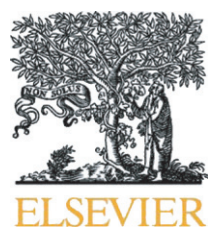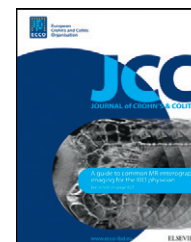

## REVIEW ARTICLE

# Magnetic resonance enterography in Crohn's disease: A guide to common imaging manifestations for the IBD physician

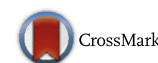

Marianne M. Amitai<sup>a</sup>, Shomron Ben-Horin<sup>b</sup>, Rami Eliakim<sup>b</sup>, Uri Kopylov<sup>b,\*</sup>

<sup>a</sup> Department of Diagnostic Imaging, Chaim Sheba Medical Center, Tel Hashomer, Sackler School of Medicine, Tel-Aviv University, Tel-Aviv, Israel

<sup>b</sup> Department of Gastroenterology, Chaim Sheba Medical Center, Tel Hashomer, Sackler School of Medicine, Tel-Aviv University, Tel-Aviv, Israel

Received 21 May 2012; received in revised form 5 October 2012; accepted 7 October 2012

### KEYWORDS

Crohn's disease;  
MRE;  
Pelvic MRI;  
Abscess;  
Fistulae;  
Strictures

### Abstract

Patients with Crohn's disease (CD) frequently require cross-sectional imaging. Magnetic resonance enterography (MRE) is an accurate tool for assessment of bowel disease and of various complications of CD. The lack of non-ionizing radiation exposure is an important advantage of this imaging modality. Familiarity with common and pathognomonic imaging features of CD is essential for every clinician that is involved in inflammatory bowel disease (IBD) patients' care. This review is aimed to describe the indications for performing MRE in CD, essentials of MRE techniques and typical radiological findings in patients with CD to aid the IBD doctor in daily practice.

© 2012 European Crohn's and Colitis Organisation. Published by Elsevier B.V. All rights reserved.

### Contents

|                                                               |     |
|---------------------------------------------------------------|-----|
| 1. Introduction                                               | 604 |
| 2. Magnetic resonance technique for evaluation of small bowel | 605 |
| 3. Typical manifestations of CD on MRE                        | 606 |
| 3.1. Mural small bowel disease                                | 606 |

**Abbreviations:** IBD, inflammatory bowel disease; CD, Crohn's disease; MRI, magnetic resonance imaging; MRE, magnetic resonance enterography; T1/T2-w, T1/T2 weighted; CT, computer tomography; CTE, CT enterography.

\* Corresponding author at: Department of Gastroenterology, Chaim Sheba Medical Center, Tel Hashomer, Sackler School of Medicine, Tel-Aviv University, Tel-Aviv 52621, Israel. Tel.: +972 50 9004259; fax: +972 3 6746739.

E-mail address: [ukopylov@gmail.com](mailto:ukopylov@gmail.com) (U. Kopylov).

|                                                           |     |
|-----------------------------------------------------------|-----|
| 3.2. Extramural manifestation of bowel disease . . . . .  | 608 |
| 3.3. Mural colonic disease . . . . .                      | 608 |
| 3.4. Stenotic disease . . . . .                           | 608 |
| 3.5. Penetrating disease . . . . .                        | 609 |
| 3.6. Fistulae . . . . .                                   | 609 |
| 3.7. Abscesses . . . . .                                  | 609 |
| 3.8. Thrombotic complications . . . . .                   | 610 |
| 3.9. MRE in pregnant women with CD . . . . .              | 610 |
| 3.10. Postsurgical complications and recurrence . . . . . | 610 |
| 3.11. Perianal disease . . . . .                          | 612 |
| 4. Limitations of MRE studies . . . . .                   | 612 |
| 5. Summary . . . . .                                      | 613 |
| Conflicts of interest . . . . .                           | 613 |
| References . . . . .                                      | 614 |

## 1. Introduction

Crohn's disease (CD) is a chronic inflammatory disease of the intestinal tract that frequently affects young patients. Although CD may involve any part of the digestive tract, small bowel involvement occurs in at least 70% of the patients.<sup>1</sup> As this section of the digestive tract is not easily accessible by conventional endoscopic techniques and because the inflammatory process may penetrate beyond the bowel wall, cross-sectional imaging is frequently employed in CD patients, both for assessing small bowel disease severity and for detection of extra-luminal complications.

Both computed tomography (CT) and MRI enable clear visualization of the entire length of the intestinal tract along with various extra- and intra-intestinal complications such as abscesses, enterovisceral and perianal fistulae, perforation and strictures. The diagnostic accuracy of MR enterography (MRE) and CT enterography (CTE) is comparable for diagnosis of CD and its complications.<sup>2</sup> Although CT is still the more commonly employed diagnostic modality in CD worldwide, MRE possesses several important advantages that have led to a steep increase in its utilization in the recent years.<sup>3</sup>

MRE provides an improved superior soft tissue contrast resolution in comparison to CT, enabling a superior visualization of the inflammatory and fibrotic characteristics of the bowel wall. Recently, diagnostic indices based on MRE-based quantitative assessment of disease severity have been developed. MRIA (magnetic resonance index of activity) is comprised of a formula incorporating wall thickness, edema, ulceration and relative contrast enhancement of the bowel calculated for each bowel segment.<sup>4</sup> This index demonstrated a significant correlation ( $r=0.82$ ,  $p=0.001$ ) with the endoscopic severity index CDEIS (Crohn's disease endoscopic index of severity) with a high accuracy for the detection of disease activity (area under the receiver operating characteristic (ROC) curve 0.891, sensitivity of 81%, specificity of 89%) and for the detection of ulcerative lesions (area under the ROC curve 0.978, sensitivity of 95%, specificity of 91%) in the colon and terminal ileum.<sup>4,3</sup> Another potentially valuable prognostic tool based on MRE is the Lemann score, aimed at the evaluation of cumulative destructive damage to cause by CD to different segments of the bowel.<sup>5</sup> For each CD location, independent variables including presence of a segment with at least grade 1 (wall thickening  $<3$  mm and/or segmental

enhancement without prestenotic dilatation), 2 (wall thickening  $\geq 3$  mm and/or mural stratification without prestenotic dilatation), or 3 (stricture with prestenotic dilatation lesion) or surgery; number of segments with at least grade 1, 2, or 3 lesion/surgery; the proportion of segments containing grade 1, 2, or 3 lesion/surgery will also be assessed (if feasible) in the case of small bowel location. The scores of different compartments are integrated into the index.<sup>5</sup> Monitoring of response to anti-inflammatory therapy may become another potential indication for MRE, enabling accurate and non-invasive method of surveillance.<sup>6</sup>

Pelvic MRI is a cornerstone modality in the evaluation of perianal CD due to its capability for providing detailed and high-quality images of the sphincter complex that are essential for evaluation of pelvic disease. Response to therapy in perianal CD can also be monitored by pelvic MRI.<sup>7,8</sup>

The impact of cumulative radiation exposure associated with recurrent CT examinations is another factor to be borne in mind when choosing between different imaging modalities. CD patients, who often develop symptoms at puberty and in young adulthood, and tend to develop complications requiring urgent interventions, are particularly subject to this kind of radiation exposure. It has been reported that up to 10% of CD patients have been exposed to a potentially harmful levels of radiation exposure defined as  $\geq 50$  milli-sieverts (mSv) (equivalent to 5 CT abdomen examinations).<sup>9</sup> Radiation exposure associated with CT imaging may vary significantly. Use of multidetector CT may allow a reduction of 10–60% in the radiation exposure attributed to efficient detector configuration, automatic exposure controls, improved filters, and image post-processing algorithms.<sup>10</sup> CT enteroclysis facilitated by luminal distention with a contrast agent delivered by a nasoenteric tube allows for a further reduction of the radiation exposure.<sup>11</sup> Recently, low-dose radiation techniques are based on modifications of exposure time, alterations of voltage and amperage and noise-reduction filters.<sup>12</sup> An alternative low-dose technique using concentrated oral contrast (Telebrix 9% instead of the commonly used 3% concentration), no intravenous contrast and a high noise index (MBCT – modified small bowel CT) valuable for depicting strictures and obstruction, along with some features compatible with inflammation, such as mesenteric fat hypertrophy and prominent vasa recta, was described.<sup>13</sup> Although resulting in lower quality images, these techniques are capable of obtaining accurate and diagnostic images.<sup>14,15</sup>

Importantly, an increased risk of complications may still persist even with lower accumulative doses of radiation.<sup>16</sup> Hence, imaging technique that is not associated with ionizing radiation, such as MRE, is particularly attractive in a cohort of young patients subject to repeated imaging.

## 2. Magnetic resonance technique for evaluation of small bowel

MRE allows multiplanar imaging of the intestinal tract. Obtaining a diagnostic MRE examination requires adequate distention of the bowel lumen achieved by means of ingestion of oral contrast, reduction of peristalsis by spasmolytics and injection of intravenous contrast material (gadolinium).

Image acquisition is obtained with several sequences. MR enterography imaging protocols vary significantly due to differences in equipment and personal expertise.<sup>17</sup> A more detailed technical description of the MRE sequences is beyond the scope of this review and could be found elsewhere.<sup>18</sup> In addition, a specific sequence can be labeled under different names for different MRI machines, as the manufacturers do not necessarily employ a homogenous terminology for description of the sequences. However, certain basic elements are common to most CD imaging protocols for CD. Fast sequences capable of acquiring T1-w and T2-w images in a single breathhold are crucial for obtaining diagnostic images and reduction of artifacts.<sup>19</sup> In our practice, we use a 1.5 T magnet Signa HDX, General Electric Medical Systems (Wisconsin, Milwaukee, USA), equipped with a phased-array 8-element coil with the following sequences

- FIESTA-steady state free precession (SSFP) sequence in axial, coronal and sagittal planes;
- FSE (fast spin echo) T2-w sequence with fat suppression, in axial and coronal planes;
- T1-w 2D FSPGR (fast spoiled gradient echo) with fat suppression and breath hold in axial and coronal planes.

T1-w 3D LAVA is performed pre- and 60 s post-intravenous contrast administration with fat suppression and breath hold in axial planes. The same sequence, in the coronal plane, is acquired 120 s after the administration of the intravenous contrast medium.

In T2-w sequence, the positive or biphasic oral contrast agent appears brighter (hyperintense) compared to the darker (hypointense) thickened bowel wall (Fig. 1A), allowing visualization of luminal stenosis and mural thickening. In T1-w sequence ingested contrast agent appears hypointense compared to the bowel wall, and following gadolinium injection, the inflamed wall enhances and appears hyperintense compared to the hypointense luminal content indicating active inflammation<sup>20,21</sup> (Fig. 1B and C).

Cine steady-state free precession (SSFP) (referred to as FIESTA, bFFE, true FISP by different manufacturers) is an ultra rapid multiplanar sequence that enables high spatial resolution images especially sensitive for detection of tubular structures such as sinus tracts and fistulae<sup>22</sup> (Fig. 1D).

Dynamic contrast enhanced (DCE) MRI is a method of investigating vascular structure and function by tracking the pharmacokinetics of injected low-molecular weight contrast agents before, during and after the injection of contrast. It

is sensitive to alterations in vascular permeability, extracellular, extravascular and vascular volumes and blood flow.

Quantitative analysis of dynamic MRI images was evaluated in small studies for assessment of bowel inflammation and disease chronicity with inconsistent results.<sup>23–25</sup>

In addition, we use a multiphase multisection coronal SSFP sequence that covers the entire small bowel and colon in order to follow peristaltic contraction of the bowel. These images may then be displayed as a cine loop to assess bowel motility, stenosis and dilatation. Because of the high image contrast, this type of sequence is also helpful for assessing mesenteric vascularity and lymphadenopathy.

Fat suppression is a sequence depressing the bright signal intensity (white) of the fat allowing for improving visualization of uptake of contrast material and detection of inflammation.<sup>26</sup> It is especially important when contrast material is contraindicated (renal insufficiency, pregnancy).

The acquisition time for an appropriate and diagnostic MRE examination may vary from 16 min to 1 h, usually approximating 20–30 min, depending on the protocols employed.<sup>19,27</sup>

Three main types of oral contrast agents exist – negative (hypointense on both T1-w and T2-w sequences), positive (hyperintense on both sequences) and the most commonly used biphasic (polyethylene glycol, sorbitol, lactulose etc.), that appear hyperintense on T2-w and hypointense on T1-w<sup>28</sup> images. The contrast agent can be delivered orally or facilitated by a nasojejunal tube (MR enteroclysis). The oral contrast is delivered in large quantities (up to 2 l), usually through an automated pump. Several studies have compared the diagnostic efficacy of oral contrast MRE and MR enteroclysis. In a prospective study of 40 patients with CD, MR enterography compared with MR with oral contrast was statistically better when visualizing superficial abnormalities ( $p < 0.01$ ), and no statistically significant differences were found in assessing the diagnostic efficacy between MR examinations for the depiction of mural stenosis and fistulae.<sup>29</sup> In a prospective study of 48 patients, even though enteroclysis was able to achieve a better distention of the small bowel, the diagnostic accuracy of both techniques was similar.<sup>30</sup> Importantly, enteroclysis is associated with a significant discomfort for the patient and is usually achieved by fluoroscopy that is associated with ionizing radiation.

When using oral contrast, a total volume of 1.5 l is usually ingested, and image acquisition should be performed 40–60 min after the ingestion in order to achieve maximal bowel distention.<sup>27</sup>

Elimination of bowel peristalsis is mandatory to improve image quality, and is achieved by the use of spasmolytics such as glucagon or scopolamine. Reduction of peristalsis is most important for fast gradient-echo sequences performed after the administration of intravenous contrast material and also may help reduce intraluminal flow artifacts (as can be noticed on Fig. 9). In our practice, we administer intravenous glucagon (1 mg) in a 50 ml saline infusion 10 min before the patient is placed on the table, with continued slow drip during the examination to prevent adverse reaction such as nausea and vomiting.

Injection of intravenous gadolinium during the examination is necessary for detection of enhancement of inflamed structures. In our institution, we administer 20–30 ml of gadolinium corresponding to a dose of 10–15 mmol, at a rate of 1 ml/s, followed by a flush of 30 ml of saline

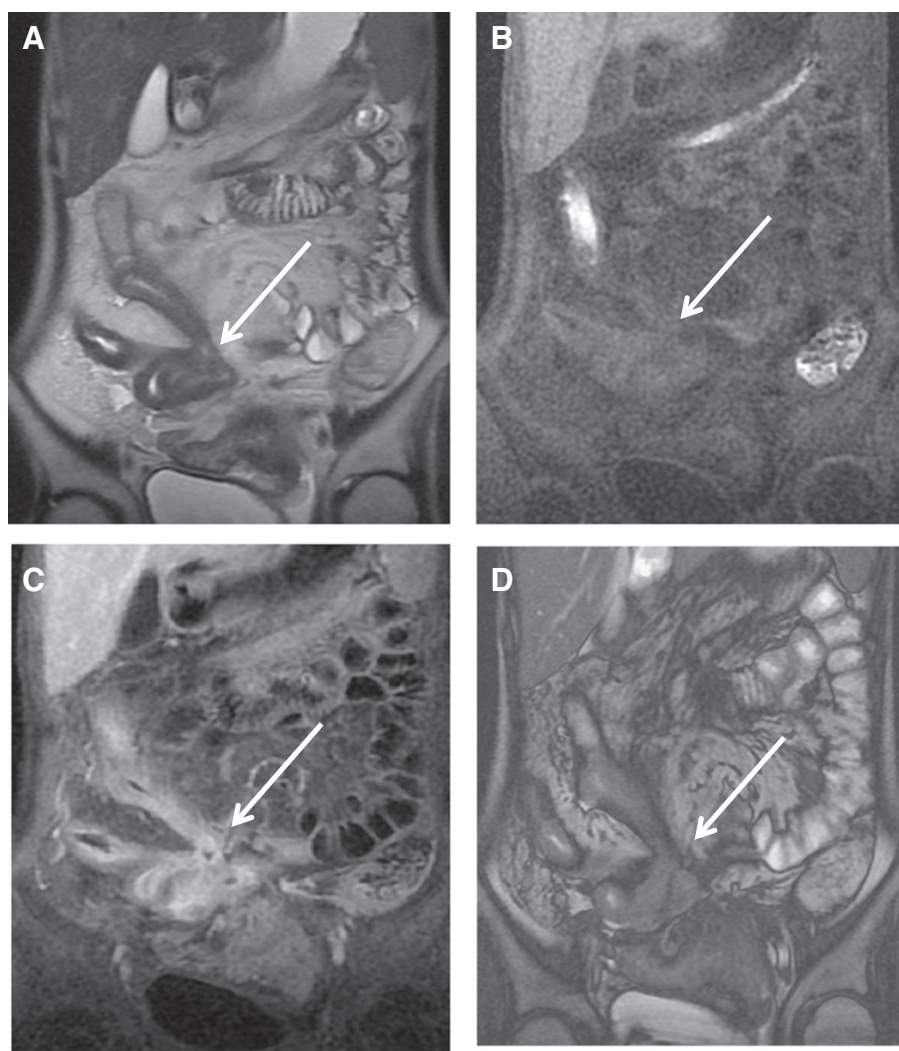

**Figure 1** “Star sign” representing convergent enteroenteric fistulae between inflamed ileal loops. T2-w (A) and T1-w (B) pre-gadolinium injection (with fat suppression). (C) T1-w post-gadolinium injection (with fat suppression). (D) FIESTA.

solution. For the same purpose, scopolamine butylbromide (Buscopan, 40 mg IV) can be employed.<sup>31</sup>

### 3. Typical manifestations of CD on MRE

#### 3.1. Mural small bowel disease

MRE is very sensitive for recognizing mural small bowel disease. Most common signs of small bowel involvement include bowel wall thickening, mucosal irregularity and mural attenuation. Inflamed bowel wall appears hyperintense on T2- w sequences and enhances after gadolinium injection on T1-w sequences (Fig. 2). However, fibrostenotic lesions may also be associated with a high contrast uptake resulting from increased permeability of the local vasculature.<sup>25</sup> In this case, T2-w fat saturated images may be instrumental in diagnosing active inflammation by demonstration a presence of an edema in active. In the study by Grieser et al.,<sup>32</sup> ROC (receiver operating curve) analysis of the total inflammatory score demonstrated an AUC (area under the curve) of 0.93 ( $p<0.001$ ) for T2-activity.

In a study by Rimola et al., a significant correlation with disease activity as represented by CD endoscopic index of severity (CDEIS) was demonstrated for segment wall thickness ( $p=0.007$ ), relative contrast enhancement (calculated using a formula incorporating wall signal intensity before and after gadolinium injection) ( $p=0.01$ ), presence of edema ( $p=0.02$ ) and ulcers ( $p=0.003$ ) on MRE.<sup>4</sup>

However, correlation of clinical and MRE staging of CD is associated with certain areas of uncertainty. A systematic review by Horsthuis et al. has demonstrated that MRE was accurate for grading frank disease 91% of the cases, but in only 62% of the patients with mild disease or remission, overstaging patients in remission in 38% of the cases. These discrepancies could be explained by the lack of gold standard stemming from inherently different nature of the diagnostic methods employed (ileocolonoscopy being capable of visualizing only the luminal surface as opposed to MRE's ability to evaluate all the layers of the bowel wall along with extraluminal pathology), in addition to a lack of defined cutoff points for differentiation of different stages of the disease, and the subjective selection of the bowel segments for disease activity



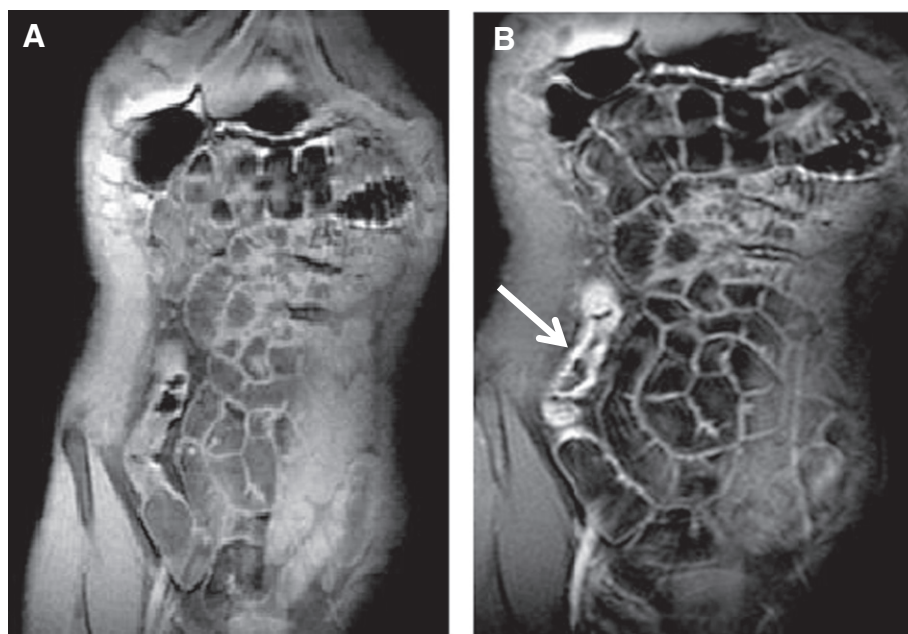

**Figure 2** Terminal ileitis: inflamed mucosa. T1-w (A) pre- and (B) post- gadolinium injection with enhancement of terminal ileum (arrow).

analysis. In addition, the included studies tended to include mostly patients with frank active disease rather than patients with mild or inactive disease.<sup>33</sup>

Additional signs of mural disease may include ulcerations, "cobble stone" appearance characteristic of multiple continuous bowel wall ulcerations (Fig. 3) and stratification of the bowel wall (heterogeneous enhancement of the layers of

the abdominal wall with hyperintense appearance of the mucosa and the serosa, and hypointense appearance of the muscularis layer on T1-w sequence) (Fig. 4), the latter reported to be associated with histologically proven acute bowel wall inflammation in several studies. However, this enhancement pattern was demonstrated to be also associated with fibrostenotic lesion.<sup>34</sup>

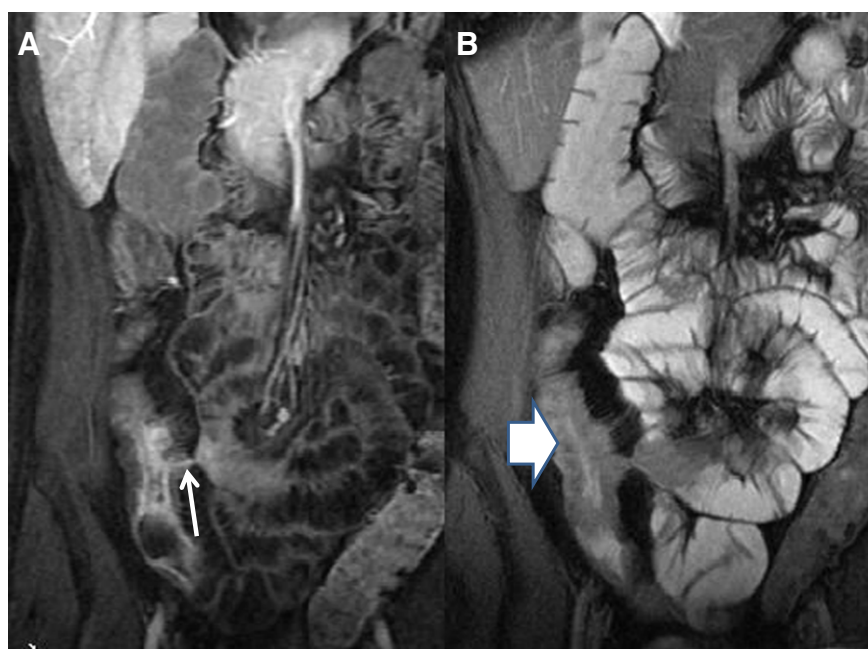

**Figure 3** Mural thickening with mucosal irregularity, ulcers and enhancement. (A) Coronal view T1-w post-gadolinium injection demonstrating irregular enhancement of the mucosa mimicking "cobble stone appearance" with deep ulceration and enteroenteric fistula (arrow). (B) FIESTA: Mural thickening due to inflammation causing luminal narrowing (arrowhead).

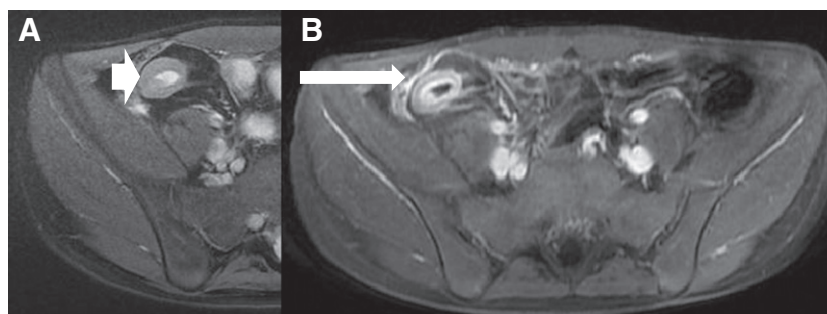

**Figure 4** Distal ileum: mural thickening and layering. T2-w (A) and T1-w post-gadolinium injection (B): mural thickening (arrowhead) and stratification (arrow). Notice mucosal enhancement (bright), submucosal edema (darker) and muscularis propria enhancement (bright).

### 3.2. Extramural manifestation of bowel disease

Substantial mural disease may be associated with extra-mural involvement that is characterized by several pathognomonic signs.

Mesenteric vascular engorgement ("comb sign," Fig. 5), usually resulting from increased inflammatory activity, can be seen as high-signal intensity parallel lines oriented perpendicular to the longitudinal access of the affected bowel wall on T1-w contrast-enhanced images,<sup>27</sup> frequently adjacent to a bowel segment showing signs of active disease. On FIESTA (fast imaging employing steady state acquisition) and T2-w sequences the comb sign can be seen as black line on the white mesenteric fat background (Fig. 10A).

Fat wrapping ("creeping fat," Fig. 6) can be described as a mass effect caused by proliferation of mesenteric resulting in a displacement of intra-abdominal viscerae or vascular structures. Fat wrapping is usually asymmetric and tends to appear more frequently on the mesenteric side of the bowel wall.<sup>27</sup> The hypertrophic fat is best seen on steady state acquisition (FIESTA sequences), as also seen in Fig. 1A and D.

Mesenteric lymphadenopathy presenting as enlargement, hyperenhancement and edema of the lymph nodes on the T1-w sequences post-gadolinium injection, as seen in Fig. 7, is highly pathognomonic for active CD.<sup>18,35</sup> Nodal edema

resulting from inflammation is better demonstrated on fat-suppressed images. Alternatively, non-enhancing lymphadenopathy may imply a different etiology such as malignancy or chronic infection such as tuberculosis or histoplasmosis.<sup>27</sup>

### 3.3. Mural colonic disease

Inflammation of the colonic wall can also be clearly demonstrated on MRE. The signs of colonic mural disease such as bowel thickening, mucosal ulcerations and mural enhancement are analogous to those of small bowel disease. Long-standing severe mucosal inflammation of the colonic mucosa may appear as polypoid structures (Fig. 8).

### 3.4. Stenotic disease

The accuracy of MRE for detection of stenosis in CD has been well established, with a pooled sensitivity and specificity of 88% and 95%, respectively.<sup>36–38</sup> Bowel stenosis usually appears as a thickened and enhanced segment preceded by a markedly distended segment ("prestenotic dilatation"). Establishing the nature of stenosis (whether predominantly active inflammatory vs. fibrostenotic) is of great therapeutic interest, an inflammatory stricture may potentially respond to

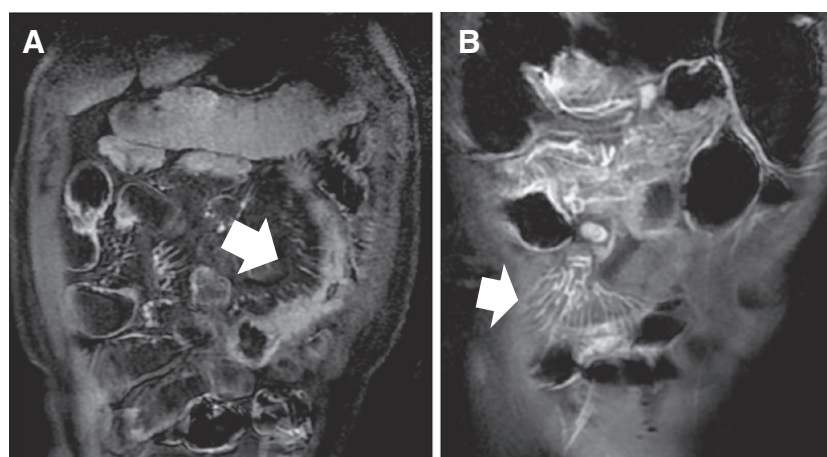

**Figure 5** Comb sign representing congested mesenteric vessel adjacent to the diseased jejunal loop (arrowhead). T1-w with fat suppression. Notice mural thickening and enhancement post-gadolinium injection.

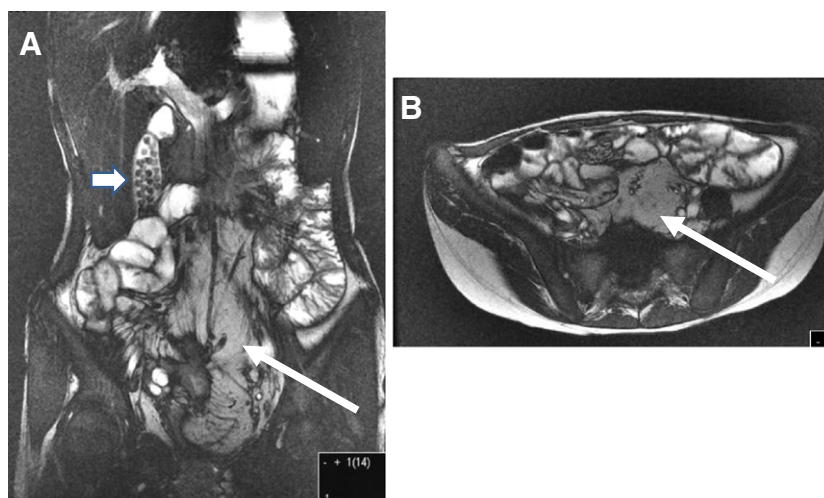

**Figure 6** Mesenteric hypertrophy (creeping fat) (arrow). (A) FIESTA coronal view. (B) FIESTA axial view. Notice cholelithiasis (arrowhead).

anti-inflammatory treatment while a fibrostenotic stricture will probably require surgical or endoscopic intervention (Fig. 9). The ability of MRE to obtain high spatial resolution with visualization of distinct enhancement patterns may be useful for guiding therapy in stenotic CD. In a study by Fornasa et al.,<sup>39</sup> evaluation of inflammatory activity as defined by T2-w signal intensity and post-gadolinium T1-w enhancement in patients with small bowel stricture has allowed reliable differentiation between active inflammatory and fibrostenotic strictures, with 96% of patients diagnosed with active inflammatory stricture achieving short-term response

to anti-inflammatory therapy. De Vescovo et al. demonstrated an association of layered enhancement (mucosa and serosa) of the bowel wall with active histological inflammation, as opposed to homogenous enhancement characteristic of fibrosis (Fig. 4).

### 3.5. Penetrating disease

MRE allows accurate diagnosis of penetrating complications of CD. Current ECCO<sup>40</sup> guidelines recommend either CT or MRE for diagnosis of intra-abdominal complications of CD, with a pooled sensitivity of 76% and specificity of 96%<sup>2,37,41–43</sup> comparable to the accuracy of CT.

### 3.6. Fistulae

Different types of intra-abdominal fistulae can be detected in CD patients by MRE. An enteroenteric fistula may appear as an enhanced sinus tract between adjacent bowel loops (Fig. 3). A "star sign" (Fig. 1) represent a conglomerate of inflamed bowel loops interconnected by multiple fistulous tracts (fig). Detection of enterovesical (Fig. 9) and enterovaginal (Fig. 10) fistulae is challenging, and may be facilitated by appearance of an air bubble in the urinary bladder or vagina that are usually air-free, commonly in a proximity to a diseased bowel loop (Fig. 11).

### 3.7. Abscesses

Abscesses appear as fluid collections encapsulated by an enhanced wall discontinuous with bowel lumen, which may also contain air (Fig. 12). Several studies have evaluated the accuracy of MRE for diagnosis of intra-abdominal abscesses in CD, with pooled sensitivity of 86% and specificity of 93% which is similar to the reported pooled accuracy of CT.<sup>2,37,42,43</sup> MRI may facilitate percutaneous guided drainage of the abscess and is useful for post-drainage follow-up.

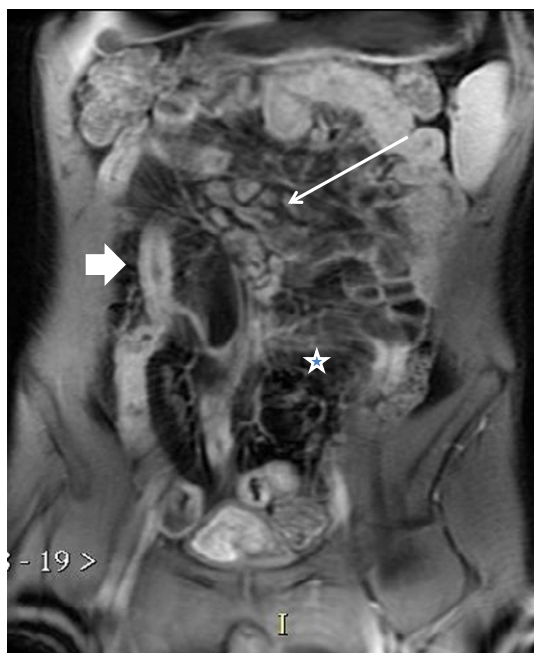

**Figure 7** Enlarged mesenteric lymph nodes (arrow). T1-w post-gadolinium injection. Thick enhancing ileal wall (arrowhead) and enhancing mesenteric hypertrophy with congested mesenteric vessels (star).



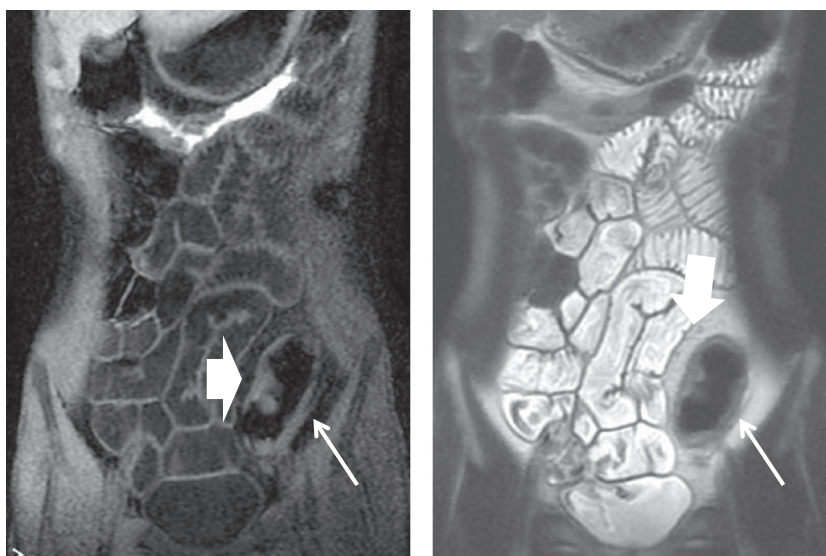

**Figure 8** Descending colitis with mural thickening. (A) T1-w post-gadolinium injection. (B) FIESTA. Notice mural thickening (arrows) and pseudopolyps (arrowheads).

### 3.8. Thrombotic complications

Inflammatory bowel diseases are associated with an increased risk of thromboembolic complications, such as deep vein thrombosis, pulmonary embolism and portal or mesenteric vein thrombosis.<sup>44,45</sup> Long-standing mesenteric vein thrombosis may appear as a cutoff of the mesenteric vein (rat-tail sign). Liver infarcts may accompany mesenteric vein thrombosis caused by pylephlebitis. Mesenteric/portal vein thrombosis may result in portal hypertension accompanied by ascites and varices (Fig. 13).

### 3.9. MRE in pregnant women with CD

MRE is invaluable when cross-sectional imaging is indicated in a pregnant patient (Fig. 14), as CT is associated with ionizing radiation potentially harmful for the fetus.

Although there are limited data suggesting fetal safety of magnetic resonance examinations, this modality is usually avoided in the first trimester. Intravenous gadolinium compounds cross the placenta and may be demonstrated in the fetal circulation and should be used judiciously.<sup>46</sup>

### 3.10. Postsurgical complications and recurrence

Abdominal surgery could be associated with a multitude of intra-abdominal complications such as anastomotic leaks, abscesses (Fig. 12), stoma-associated complications (Fig. 15) and bowel obstruction. MRE, although not always readily available in these frequently urgent settings, still comprises a possible alternative to CT imaging for these patients. MRE could be also instrumental in monitoring post-operative disease recurrence, with a good correlation of an MR-based-score with an endoscopic Rutgeerts score.<sup>47</sup>

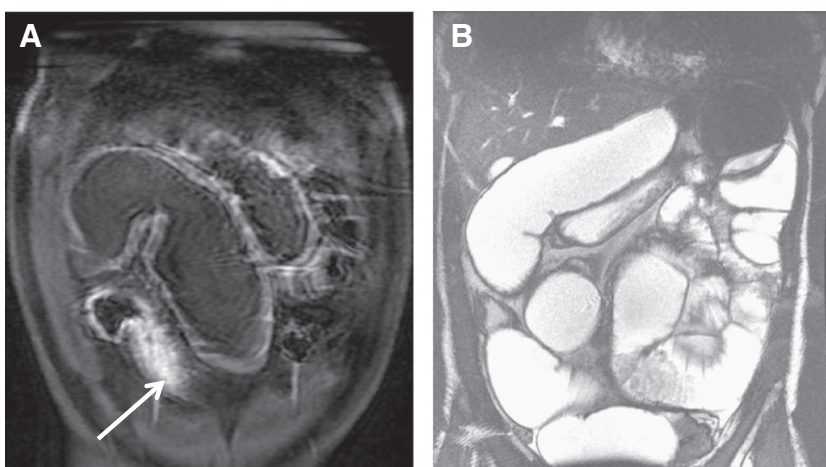

**Figure 9** Bowel obstruction. (A) Coronal T1-w post-gadolinium injection: enhancing inflammatory stricture in the distal ileum (arrow). (B) Coronal FIESTA: fibrostenotic stricture causing marked distention of ileal loops. Notice the artifact on (A) secondary to increase peristaltic proximal to stenosis.



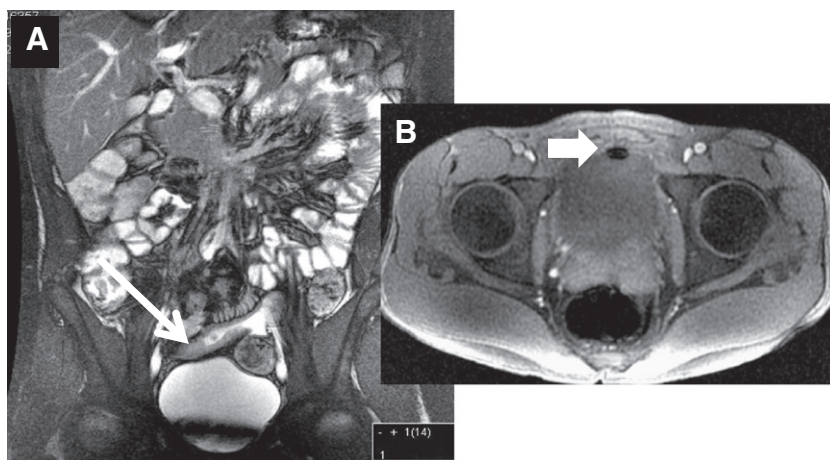

**Figure 10** Enterovesical fistula appearing as mural thickening with air in the urinary bladder. (A) FIESTA. (B) T1-w post-gadolinium injection. (A) Coronal view: distal ileitis with mural thickening (arrow) adjacent to the urinary bladder. Notice comb sign (arrowhead). (B) Axial view: bubble of air in the urinary bladder (arrowhead) consistent with pneumaturia secondary to the enterovesical fistula.

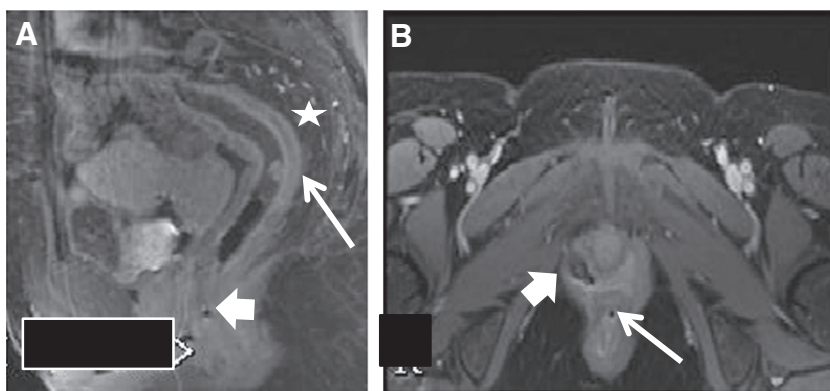

**Figure 11** Rectovaginal fistula secondary to proctitis with mural thickening. T1-w post-gadolinium injection. (A) Sagittal view of thickened rectum (arrow) with perirectal fat hypertrophy (star). Notice air bubble between the rectum and the vagina (arrowhead). (B) Axial view demonstrating air in the vagina (arrowhead) and the fistula tract from the rectum (arrow).

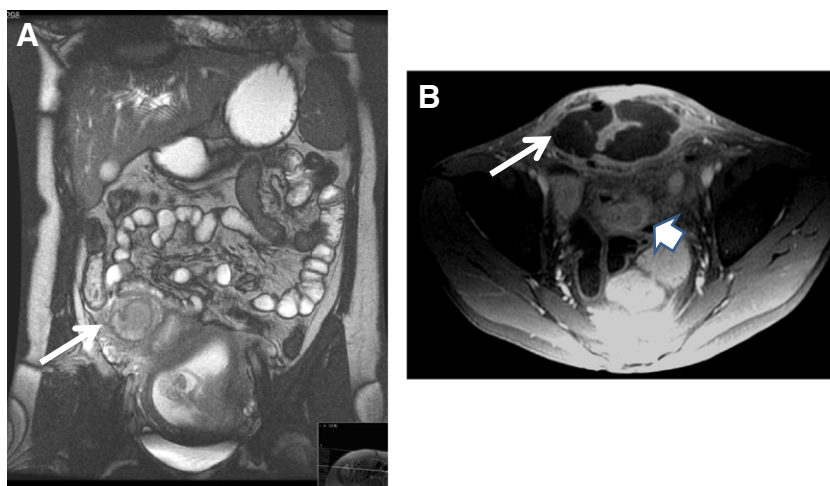

**Figure 12** Abscesses (arrows). (A) FIESTA: coronal view, abscess following resection of appendix involved by Crohn's disease in a pregnant patient. (B) Axial view T1-w post-gadolinium injection: abdominal wall abscess. Notice enhancement of abscess capsule and necrotic nonenhancing fluid (pus) and adjacent inflamed ileal loop in the pelvis (arrowhead).

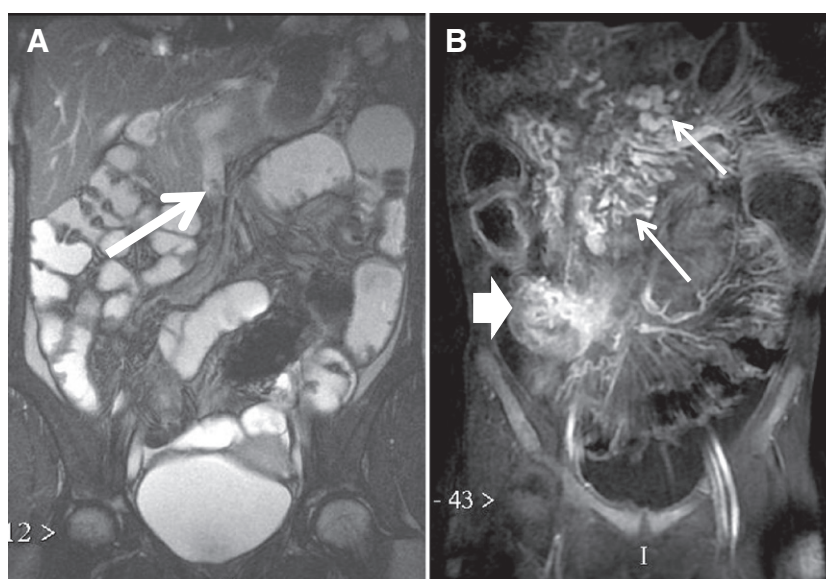

**Figure 13** Mesenteric vein thrombosis (two different patients). (A) Coronal FIESTA. (B) Coronal T1-w post-injection. (A) Thrombus in mesenteric vein (arrow.) (B) Mesenteric varices (thin arrows). Notice enhancing star sign (arrowhead).

### 3.11. Perianal disease

MRI is a cornerstone modality in evaluation of pelvic and perianal CD (Figs. 16 and 17). When compared with surgical examination under anesthesia, the sensitivity and specificity of MRI for detecting fistula tracks were 100% and 86%; for abscesses, 96% and 97; for horseshoe fistulas, 100% and 100; and for internal openings, 96% and 90%, respectively.<sup>48</sup> In the study by Beets-Tan et al.,<sup>48</sup> additional information leading to modification of the surgical procedure was obtained in 40% of the patients with perianal CD who were previously evaluated by endoanal ultrasound. A combination of these two modalities may further increase the diagnostic accuracy.<sup>49</sup> Pelvic MRI may also play an important role in monitoring anti-TNF therapy in perianal CD.<sup>50–52</sup>

### 4. Limitations of MRE studies

Several important limitations of MRE in comparison to CT imaging should be acknowledged. CT provides superior overall image quality with better spatial resolution, requiring a significantly shorter acquisition time (8–10 s for CTE and 20–30 min for MRE).<sup>20</sup> MRI is not suitable for claustrophobic patients, although recently utilization of open MRI machines for these patients has been reported.<sup>53–55</sup> In many countries, MRI scanners are currently less accessible and significantly more costly,<sup>20,28,56</sup> especially in the smaller and more peripheral centers.

Despite these limitations, MRE possesses a diagnostic accuracy similar to CTE sparing the exposure to non-ionizing radiation, and thus should be preferred when possible,

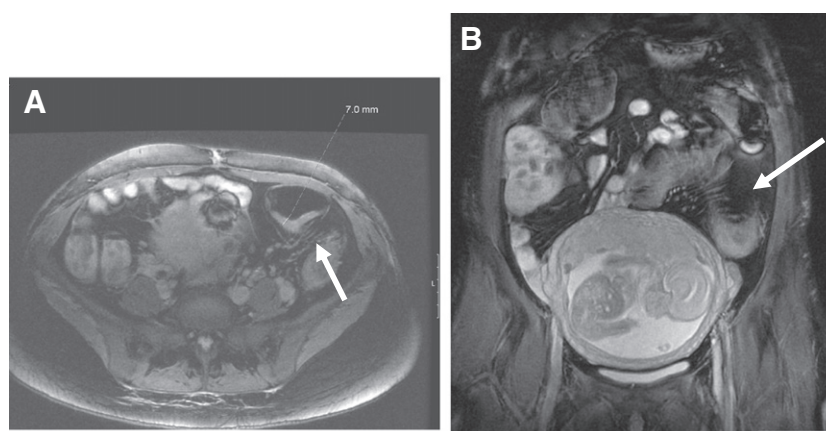

**Figure 14** Crohn's colitis in a pregnant patient. (A) Axial FIESTA. (B) Coronal FIESTA. (A) Descending colitis with mural thickening (7 mm) and comb sign (arrow). (B) Upward displaced thickened wall of sigmoid colon with comb sign (arrow).

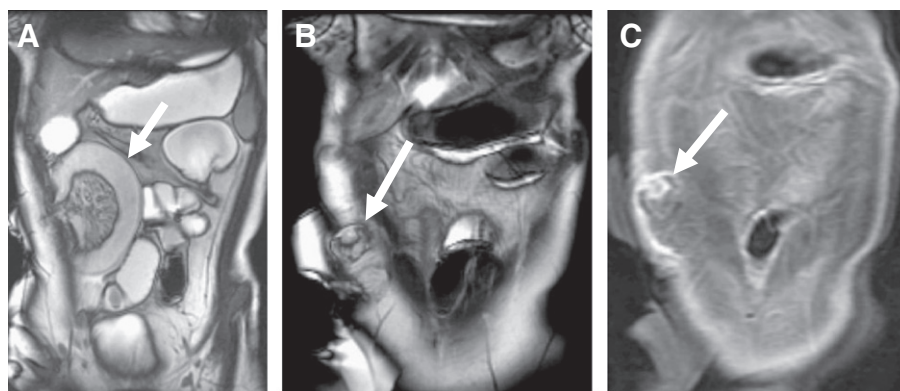

**Figure 15** Postoperative complication: inflammatory stenosis of ileostomy. Coronal FIESTA (A) and T1-w (B) post-gadolinium injection. (C) Distended neoterminal ileum due to recurrence of the disease at the ileostomy site, with thickening and enhancement of the stoma after gadolinium injection (arrows).

especially in patients requiring repeated examinations. In perianal CD, MRI is the diagnostic modality of choice due to its superior soft tissue visualization enabling accurate diagnosis and staging of perianal fistulae.<sup>48,49</sup>

## 5. Summary

MRE is an imaging modality that is growing in usage and importance in CD diagnosis and follow-up. Clinicians caring for these patients should be familiar with MRE techniques, as well as with the limitations and strengths of this modality as outlined in the present review. Moreover, because this modality is likely to become even more prevalent as a diagnostic imaging tool for evaluating CD patients in the near future, clinicians may find it increasingly useful to acquaint

themselves with the appearance of the different radiological features of the disease on MRE, as provided in this practical guide. Improved familiarity and understanding of the strengths and limitations of this imaging modality by the clinician will facilitate better inter-disciplinary co-operation with the radiologist for both in the choice of the imaging modality and in the interpretation of the results obtained and will hopefully lead to improved patient's care and outcome.

## Conflicts of interest

Dr. Ben-Horin has received lecturer fees from Abbott and Schering Plough. Prof. Eliakim has received lecturer fees from Abbott. Other authors have no conflicts of interest to declare.

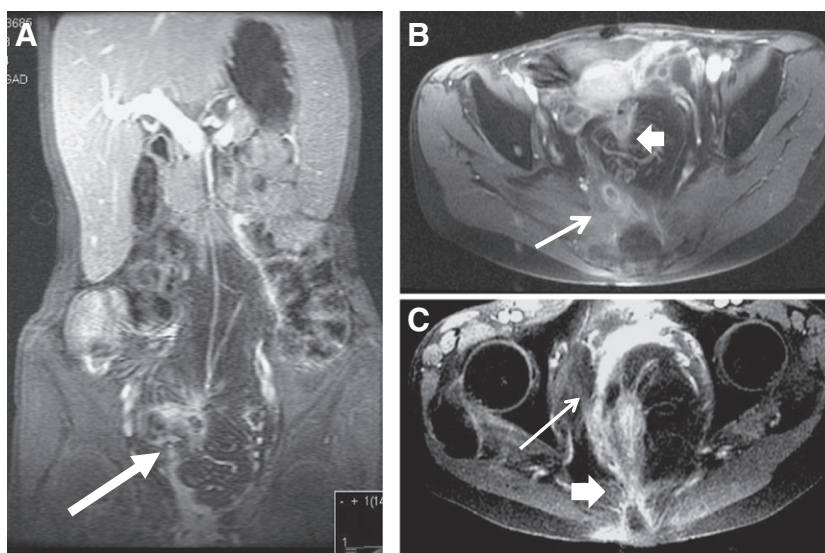

**Figure 16** Complex perianal and pelvic fistula. T1-w post-gadolinium injection. (A) Coronal view of the perianal fistula forming a pelvic abscess (arrow). (B) Axial view demonstrating same abscess located behind the uterus (arrowhead). Notice an additional presacral abscess (thin arrow). (C) Axial view demonstrating two fistulous tracts: one from the anal canal to the right gluteus (arrowhead), and another tract pointed antero-superiorly (thin arrow).



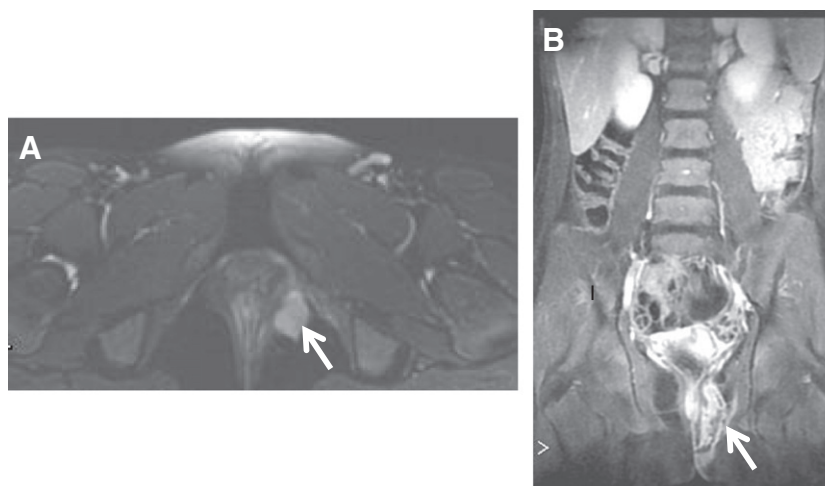

**Figure 17** Ischiorectal abscess. Axial T2-w (A) and coronal T1-w post-gadolinium injection (B). Abscess in the left ischiorectal fossa (arrow).

## References

- Martin DR, Lauenstein T, Sitaraman SV. Utility of magnetic resonance imaging in small bowel Crohn's disease. *Gastroenterology* 2007;**133**:385–90.
- Panes J, Bouzas R, Chaparro M, et al. Systematic review: the use of ultrasonography, computed tomography and magnetic resonance imaging for the diagnosis, assessment of activity and abdominal complications of Crohn's disease. *Aliment Pharmacol Ther* 2011;**34**:125–45.
- Rimola J, Ordas I, Rodriguez S, et al. Magnetic resonance imaging for evaluation of Crohn's disease: validation of parameters of severity and quantitative index of activity. *Inflamm Bowel Dis* 2011;**17**:1759–68.
- Rimola J, Rodriguez S, Garcia-Bosch O, et al. Magnetic resonance for assessment of disease activity and severity in ileocolonic Crohn's disease. *Gut* 2009;**58**:1113–20.
- Pariente B, Cosnes J, Danese S, et al. Development of the Crohn's disease digestive damage score, the Lemann score. *Inflamm Bowel Dis* 2011;**17**:1415–22.
- Sempere GA, Martinez Sanjuan V, Medina Chulia E, et al. MRI evaluation of inflammatory activity in Crohn's disease. *AJR Am J Roentgenol* 2005;**184**:1829–35.
- Savoye-Collet C, Savoye G, Koning E, Dacher JN, Lerebours E. Fistulizing perianal Crohn's disease: contrast-enhanced magnetic resonance imaging assessment at 1 year on maintenance anti-TNF-alpha therapy. *Inflamm Bowel Dis* 2011;**17**:1751–8.
- Tozer PJ, Burling D, Gupta A, Phillips RK, Hart AL. Review article: medical, surgical and radiological management of perianal Crohn's fistulas. *Aliment Pharmacol Ther* 2011;**33**:5–22.
- Chatu S, Subramanian V, Pollok RC. Meta-analysis: diagnostic medical radiation exposure in inflammatory bowel disease. *Aliment Pharmacol Ther* 2012.
- Kalra MK, Rizzo SM, Novelline RA. Technologic innovations in computer tomography dose reduction: implications in emergency settings. *Emerg Radiol* 2005;**11**:127–8.
- Maglinte DD, Bartram C. Dynamic imaging of posterior compartment pelvic floor dysfunction by evacuation proctography: techniques, indications, results and limitations. *Eur J Radiol* 2007;**61**:454–61.
- O'Neill SB, O'Connor OJ, McWilliams SR, Shanahan F, Maher MM. Minimization of radiation exposure due to computed tomography in inflammatory bowel disease. *Clin Res Hepatol Gastroenterol* 2011;**35**:105–10.
- Kielar AZ, Tao H, Thipphavong S. Modified small bowel CT (MBCT) for evaluating sub-acute and chronic conditions affecting the small bowel: a low radiation-dose, unenhanced CT protocol. *Insights Imag* 2011;**2**:539–42.
- Craig O, O'Neill S, O'Neill F, et al. Diagnostic accuracy of computed tomography using lower doses of radiation for patients with Crohn's disease. *Clin Gastroenterol Hepatol* 2012;**10**:886–92.
- Kielar AZ, Tao H, McKeever C, El-Maraghi RH. Low-radiation-dose modified small bowel CT for evaluation of recurrent Crohn's disease. *Gastroenterol Res Pract* 2012;**2012**:598418.
- Brenner DJ, Doll R, Goodhead DT, et al. Cancer risks attributable to low doses of ionizing radiation: assessing what we really know. *Proc Natl Acad Sci U S A* 2003;**100**:13761–6.
- Leyendecker JR, Bloomfield RS, DiSantis DJ, Waters GS, Mott R, Bechtold RE. MR enterography in the management of patients with Crohn disease. *Radiographics* 2009;**29**:1827–46.
- Gourtsoyiannis NC, Papanikolaou N, Karantanis A. Magnetic resonance imaging evaluation of small intestinal Crohn's disease. *Best Pract Res Clin Gastroenterol* 2006;**20**:137–56.
- Mazziotti S, Ascenti G, Scribano E, et al. Guide to magnetic resonance in Crohn's disease: from common findings to the more rare complications. *Inflamm Bowel Dis* 2010.
- Fiorino G, Bonifacio C, Malesci A, Balzarini L, Danese S. MRI in Crohn's disease-current and future clinical applications. *Nat Rev Gastroenterol Hepatol* 2011;**9**:23–31.
- Shrot S, Konen E, Hertz M, Amitai MM. Magnetic resonance enterography: 4 years experience in a tertiary medical center. *Isr Med Assoc J* 2011;**13**:172–7.
- Masselli G, Casciani E, Poletti E, Lanciotti S, Bertini L, Gualdi G. Assessment of Crohn's disease in the small bowel: prospective comparison of magnetic resonance enteroclysis with conventional enteroclysis. *Eur Radiol* 2006;**16**:2817–27.
- Oommen J, Oto A. Contrast-enhanced MRI of the small bowel in Crohn's disease. *Abdom Imaging* 2011;**36**:134–41.
- Oto A, Kayhan A, Williams JT, et al. Active Crohn's disease in the small bowel: evaluation by diffusion weighted imaging and quantitative dynamic contrast enhanced MR imaging. *J Magn Reson Imaging* 2011;**33**:615–24.
- Taylor SA, Punwani S, Rodriguez-Justo M, et al. Mural Crohn disease: correlation of dynamic contrast-enhanced MR imaging findings with angiogenesis and inflammation at histologic examination-pilot study. *Radiology* 2009;**251**:369–79.
- Laghi A, Passariello R. Magnetic Resonance in the study of the small bowel. *Radiol Med* 2003;**106**:1–15 [quiz 6–7].

27. Tolan DJ, Greenhalgh R, Zealley IA, Halligan S, Taylor SA. MR enterographic manifestations of small bowel Crohn disease. *Radiographics* 2010;30:367–84.
28. Mazziotti S, Ascenti G, Scribano E, et al. Guide to magnetic resonance in Crohn's disease: from common findings to the more rare complications. *Inflamm Bowel Dis* 2011;17:1209–22.
29. Masselli G, Casciani E, Poletti E, Gualdi G. Comparison of MR enteroclysis with MR enterography and conventional enteroclysis in patients with Crohn's disease. *Eur Radiol* 2008;18:438–47.
30. Negaard A, Paulsen V, Sandvik L, et al. A prospective randomized comparison between two MRI studies of the small bowel in Crohn's disease, the oral contrast method and MR enteroclysis. *Eur Radiol* 2007;17:2294–301.
31. Froehlich JM, Patak MA, von Weyarn C, Juli CF, Zollkofer CL, Wentz KU. Small bowel motility assessment with magnetic resonance imaging. *J Magn Reson Imaging* 2005;21:370–5.
32. Grieser C, Denecke T, Steffen IG, et al. Magnetic resonance enteroclysis in patients with Crohn's disease: fat saturated T2-weighted sequences for evaluation of inflammatory activity. *J Crohns Colitis* 2012;6:294–301.
33. Horsthuis K, Bipat S, Stokkers PC, Stoker J. Magnetic resonance imaging for evaluation of disease activity in Crohn's disease: a systematic review. *Eur Radiol* 2009;19:1450–60.
34. Punwani S, Rodriguez-Justo M, Bainbridge A, et al. Mural inflammation in Crohn disease: location-matched histologic validation of MR imaging features. *Radiology* 2009;252:712–20.
35. Gourtsoyianni S, Papanikolaou N, Amanakis E, et al. Crohn's disease lymphadenopathy: MR imaging findings. *Eur J Radiol* 2009;69:425–8.
36. Pariente B, Peyrin-Biroulet L, Cohen L, Zagdanski AM, Colombel JF. Gastroenterology review and perspective: the role of cross-sectional imaging in evaluating bowel damage in Crohn disease. *AJR Am J Roentgenol* 2011;197:42–9.
37. Maccioni F, Bruni A, Viscido A, et al. MR imaging in patients with Crohn disease: value of T2- versus T1-weighted gadolinium-enhanced MR sequences with use of an oral superparamagnetic contrast agent. *Radiology* 2006;238:517–30.
38. Tillack C, Seiderer J, Brand S, et al. Correlation of magnetic resonance enteroclysis (MRE) and wireless capsule endoscopy (CE) in the diagnosis of small bowel lesions in Crohn's disease. *Inflamm Bowel Dis* 2008;14:1219–28.
39. Fornasa F, Benassuti C, Benazzato L. Role of magnetic resonance enterography in differentiating between fibrotic and active inflammatory small bowel stenosis in patients with Crohn's disease. *J Clin Imaging Sci* 2011;1:35.
40. Dignass A, Van Assche G, Lindsay JO, et al. The second European evidence-based Consensus on the diagnosis and management of Crohn's disease: current management. *J Crohns Colitis* 2010;4:28–62.
41. Martinez MJ, Ripolles T, Paredes JM, Blanc E, Marti-Bonmati L. Assessment of the extension and the inflammatory activity in Crohn's disease: comparison of ultrasound and MRI. *Abdom Imaging* 2009;34:141–8.
42. Lee SS, Kim AY, Yang SK, et al. Crohn disease of the small bowel: comparison of CT enterography, MR enterography, and small-bowel follow-through as diagnostic techniques. *Radiology* 2009;251:751–61.
43. Zappa M, Stefanescu C, Cazals-Hatem D, et al. Which magnetic resonance imaging findings accurately evaluate inflammation in small bowel Crohn's disease? A retrospective comparison with surgical pathologic analysis. *Inflamm Bowel Dis* 2011;17:984–93.
44. Maconi G, Bolzacchini E, Dell'Era A, Russo U, Ardizzone S, de Franchis R. Portal vein thrombosis in inflammatory bowel diseases: a single-center case series. *J Crohns Colitis* 2012;6:362–7.
45. Kopylov U, Amitai MM, Lubetsky A, Eliakim R, Chowers Y, Ben-Horin S. Clinical and radiographic presentation of superior mesenteric vein thrombosis in Crohn's disease: a single center experience. *J Crohns Colitis* 2011.
46. Leyendecker JR, Gorengaut V, Brown JJ. MR imaging of maternal diseases of the abdomen and pelvis during pregnancy and the immediate postpartum period. *Radiographics* 2004;24:1301–16.
47. Sailer J, Peloschek P, Reinisch W, Vogelsang H, Turetschek K, Schima W. Anastomotic recurrence of Crohn's disease after ileocolic resection: comparison of MR enteroclysis with endoscopy. *Eur Radiol* 2008;18:2512–21.
48. Beets-Tan RG, Beets GL, van der Hoop AG, et al. Preoperative MR imaging of anal fistulas: does it really help the surgeon? *Radiology* 2001;218:75–84.
49. Schwartz DA, Wiersema MJ, Dudiak KM, et al. A comparison of endoscopic ultrasound, magnetic resonance imaging, and exam under anesthesia for evaluation of Crohn's perianal fistulas. *Gastroenterology* 2001;121:1064–72.
50. Van Assche G, Vanbeckevoort D, Bielen D, et al. Magnetic resonance imaging of the effects of infliximab on perianal fistulizing Crohn's disease. *Am J Gastroenterol* 2003;98:332–9.
51. Savoye-Collet C, Savoye G, Koning E, Dacher JN, Lerebours E. Fistulizing perianal Crohn's disease: contrast-enhanced magnetic resonance imaging assessment at 1 year on maintenance anti-TNF-alpha therapy. *Inflamm Bowel Dis* 2010.
52. Karmiris K, Bielen D, Vanbeckevoort D, et al. Long-term monitoring of infliximab therapy for perianal fistulizing Crohn's disease by using magnetic resonance imaging. *Clin Gastroenterol Hepatol* 2011;9:130–6.
53. Enders J, Zimmermann E, Rief M, et al. Reduction of claustrophobia during magnetic resonance imaging: methods and design of the "CLAUSTRO" randomized controlled trial. *BMC Med Imaging* 2011;11:4.
54. Enders J, Zimmermann E, Rief M, et al. Reduction of claustrophobia with short-bore versus open magnetic resonance imaging: a randomized controlled trial. *PLoS One* 2011;6:e23494.
55. Hunt CH, Wood CP, Lane JI, Bolster BD, Bernstein MA, Witte RJ. Wide, short bore magnetic resonance at 1.5 t: reducing the failure rate in claustrophobic patients. *Clin Neuroradiol* 2011;21:141–4.
56. Vaknin S, Shemer J, Luxenburg O. Medical resonance imaging (MRI)—the technology, the regulation and the utilization pattern in Israel. *Harefuah* 2012;151:306–9 [17].
